# Supplementary material
Source: Springer Nature journal article supplement (https://www.springermedizin.de/resource/supplementary/13256_2007_348_MOESM2_ESM.pdf/9645784)
Supplement: MOESM2 [file 9645784]

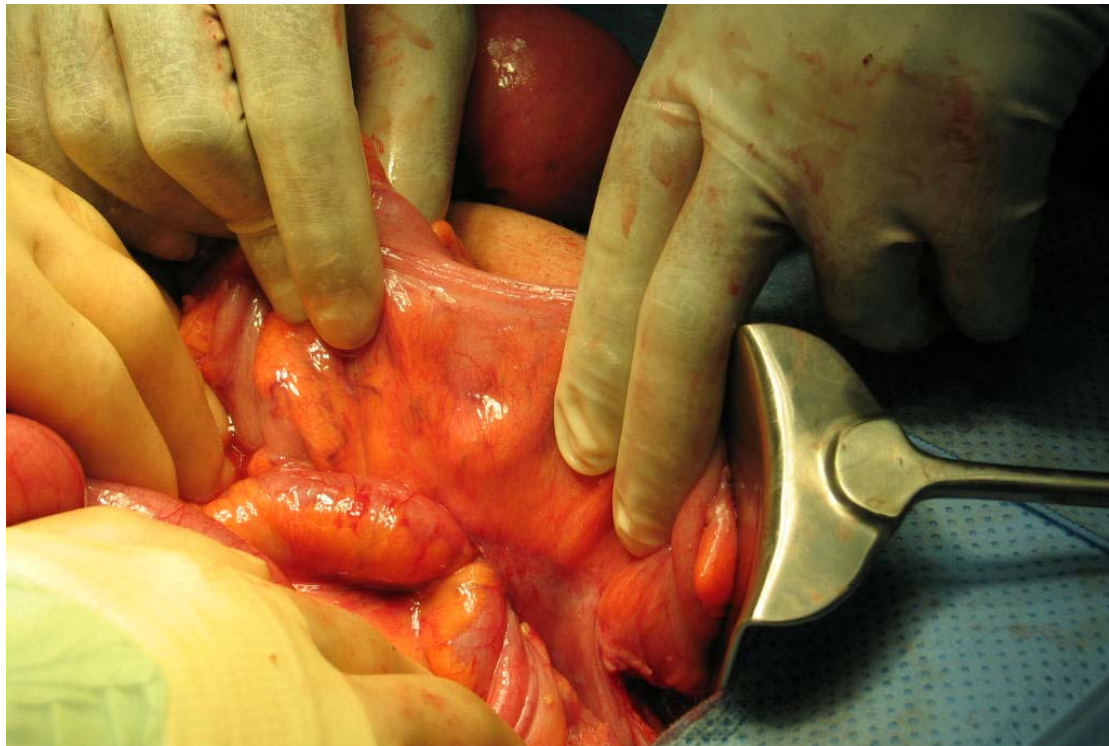

Figure 2: Intra-operative image demonstrating herniation of small bowel through the sigmoid mesentery.
